# Supplementary material for: RhoGEF12 controls cardiac remodeling by integrating G protein– and integrin-dependent signaling cascades
Source: PubMed Central journal article supplement — J Exp Med. 2013 Apr 8;210(4):665–73. doi: 10.1084/jem.20122126 (PMC3620351; doi:10.1084/jem.20122126), 2013-04-08
Supplement: supp_jem.20122126_JEM_20122126_sm.pdf [file supp_jem.20122126_JEM_20122126_sm.pdf]

## SUPPLEMENTAL MATERIAL

Takefuji et al., <http://www.jem.org/cgi/content/full/jem.20122126/DC1>**Table S1.** Primer sequences and probes (Universal probe library) for the quantification of mouse gene expression

| Gene            | Forward primer                  | Reverse primer                             | Probe no. |
|-----------------|---------------------------------|--------------------------------------------|-----------|
| <i>Mcf2l</i>    | 5'-GCCGTCCTCTTCTGCAAG-3'        | 5'-TAGGAAGGAGCCTTCTCGTATC-3'               | #52       |
| <i>Mcf2</i>     | 5'-TGAACACGCTACCTTTCTGATATTT-3' | 5'-GCTGTAAGAGTCTATGCACCTTGAA-3'            | #15       |
| <i>Trio</i>     | 5'-GAAGGCCTTACCAAAGTAGTTGAT-3'  | 5'-CAGGCAGCCGTCAAACCTC-3'                  | #33       |
| <i>Arhgef25</i> | 5'-GTCAGCGTCTGCTGTCTCG-3'       | 5'-ATCGGAGAACACGGATCAGA-3'                 | #71       |
| <i>Farp1</i>    | 5'-CACCGGCTCATGCACTATAA-3'      | 5'-GTTGGTGGGTGGTGCTT-3'                    | #80       |
| <i>Bcr</i>      | 5'-CTGCAGCTCCAACGAGAAC-3'       | 5'-CTGGACTGGCCAGAGGAACTGGACTGGCCAGAGGAA-3' | #101      |
| <i>Abr</i>      | 5'-CATCAGCAGTATGACTGTAAGTGGT-3' | 5'-CAGGGGATGGGAACACTAAG-3'                 | #106      |
| <i>Arhgef17</i> | 5'-CCTCTCCAAGCACCGTCA-3'        | 5'-GGGTGAACATAGAAGTTGAAG-3'                | #26       |
| <i>Ect2</i>     | 5'-CGCAAGAGACGGAGATTGA-3'       | 5'-GGAGGGAAAGGAGAGAGGTC-3'                 | #80       |
| <i>Ngef</i>     | 5'-TCGGTACCCATCATCTCACA-3'      | 5'-AATTTCTCTGAAGAGCTTCTTGGT-3'             | #66       |
| <i>Net1</i>     | 5'-GGAAGACACCAGGAACATGAA-3'     | 5'-ACTGTGCTTTGTCCCTTGCT-3'                 | #64       |
| <i>Arhgef12</i> | 5'-TGGCAGTCTTCTCACGATA-3'       | 5'-ATTTTCCAAGTCCCGGATG-3'                  | #96       |
| <i>Arhgef1</i>  | 5'-CCTGGGAGCAGGAAGTCTGAG-3'     | 5'-TCATAGTTGCCTCGGCTTTC-3'                 | #67       |
| <i>Akap13</i>   | 5'-GGCACCTGAGAGTCGAGAGA-3'      | 5'-CCTCCTTCCATTACCA-3'                     | #40       |
| <i>Arhgef2</i>  | 5'-ACACACCCTGTTGCAGGAA-3'       | 5'-GCTGCCAGCTTCAGTTGC-3'                   | #103      |
| <i>Vav1</i>     | 5'-GTCCTCTGTGCAATTGCT-3'        | 5'-AACCTCGCGAAGATTAATGG-3'                 | #38       |
| <i>Vav2</i>     | 5'-TCCCAAGATGGTTGCTGTG-3'       | 5'-TCCTGTCTGGAAGGTCAACA-3'                 | #79       |
| <i>Vav3</i>     | 5'-GCTCATCCACAGCAAGGTG-3'       | 5'-GGCAGAGCAGGACTCCATC-3'                  | #95       |
| <i>Arhgef3</i>  | 5'-TCCGTCAGGCAAAAGAACT-3'       | 5'-CCAGTCCCTCAGAGTCAAGC-3'                 | #64       |
| <i>Plekhg5</i>  | 5'-TCCAGTCGGACGAATCTT-3'        | 5'-CTCGCTGGTGGGAGTGAC-3'                   | #38       |
| <i>ANP</i>      | 5'-CACAGATCTGATGGATTCAAGA-3'    | 5'-CCTCATCTTCTACCGGCATC-3'                 | #25       |
| <i>BNP</i>      | 5'-GTCAGTCGTTGGGCTGTAAC-3'      | 5'-AGACCCAGGCAGAGTCAGAA-3'                 | #71       |
| <i>β-MHC</i>    | 5'-CGCATCAAGGAGCTCACC-3'        | 5'-CTGCAGCCGAGTAGGTT-3'                    | #6        |
| <i>Col1a1</i>   | 5'-CATGTTCAAGCTTTGTGGACCT-3'    | 5'-GCAGCTGACTTCAGGGATGT-3'                 | #15       |
| <i>Col3a1</i>   | 5'-TCCCTGGAATCTGTGAATC-3'       | 5'-TGAGTCGAATTGGGGAGAAT-3'                 | #49       |
| <i>Col4a1</i>   | 5'-TTAAAGGACTCCAGGGACCAC-3'     | 5'-CCCAGTACTGCTCACAC-3'                    | #56       |
| <i>GAPDH</i>    | 5'-AGCTGTGTCATCAACGGGAAG-3'     | 5'-TTTGATGTTAGTGGGGTCTCG-3'                | #9        |

**Table S2.** Primer sequences and probes (Universal probe library) for the quantification of human gene expression

| Gene            | Forward primer                   | Reverse primer                  | Probe no. |
|-----------------|----------------------------------|---------------------------------|-----------|
| <i>Mcf2l</i>    | 5'-TGGACAGCGTGACAGAG-3'          | 5'-AGCTGTCGACACCAATCTGA-3'      | #32       |
| <i>Mcf2</i>     | 5'-TTAAGGACAAACATTGTGAAACC-3'    | 5'-TGCATTAAGAAATGACTGATGTCC-3'  | #68       |
| <i>Trio</i>     | 5'-CAGAGCAACGGGAGTGAAG-3'        | 5'-CCGTGTAATCGTGTGACC-3'        | #22       |
| <i>Arhgef25</i> | 5'-CTAACCCAGAGGCCGGAGAC-3'       | 5'-GAAGGGGGAGGGATGGTA-3'        | #75       |
| <i>Farp1</i>    | 5'-AGCAAGCTCTCGGGGAAG-3'         | 5'-TAGCAGGACGTGTTGAACA-3'       | #67       |
| <i>Bcr</i>      | 5'-CCCCAAGCCAGTTCATCTC-3'        | 5'-CCACTCCCTTACCCTGTC-3'        | #81       |
| <i>Abr</i>      | 5'-AAAATGTGCCAACCTGGTGT-3'       | 5'-GCTCCTCTGCTCCATCA-3'         | #19       |
| <i>Arhgef17</i> | 5'-AATAAATAGAAACACCAGATGACTGC-3' | 5'-ACTGAGCCCTGAGGTTGCT-3'       | #49       |
| <i>Ect2</i>     | 5'-TGGTACTTGTAATTAGCACTTGGTG-3'  | 5'-CTTCAAGAAGAAAAATCAAATAGCA-3' | #11       |
| <i>Ngf</i>      | 5'-TCCCAACCCAGAGTGCC-3'          | 5'-GCGTGCAGGAAATCGTGT-3'        | #16       |
| <i>Net1</i>     | 5'-ACCCCATGTTAAAGTTGTCCA-3'      | 5'-TGCAGAGGTATGTAAGAGTCCAGA-3'  | #35       |
| <i>Arhgef12</i> | 5'-GGATTTCCCTCTCTGAGGAAG-3'      | 5'-CAGTCCAGAGTGAGTCGAGCTA-3'    | #65       |
| <i>Arhgef1</i>  | 5'-GCATTCCTGTTCCTCGAT-3'         | 5'-TCCTCGATGAGGTAGCCACT-3'      | #16       |
| <i>Akap13</i>   | 5'-TGGCCTGAGTGCTGACTTTA-3'       | 5'-GATGAGGATGGCTTGTTC-3'        | #63       |
| <i>Arhgef2</i>  | 5'-GGGTATATTCAGGCTCATCCAC-3'     | 5'-TCCAAGACGGATGTTGCAG-3'       | #3        |
| <i>Vav1</i>     | 5'-CGCCCAAGATGACAGAGTATG-3'      | 5'-CCTCCGTCTGCTGGATCTC-3'       | #27       |
| <i>Vav2</i>     | 5'-GCAGCAGCCCATGATTAGAT-3'       | 5'-GTACTTGGCCTCGGTCTCT-3'       | #40       |
| <i>Vav3</i>     | 5'-GTTTTGTCTGTTGCCGTAG-3'        | 5'-AGGAGTGTTTCTGCTGTGTGA-3'     | #32       |
| <i>Arhgef3</i>  | 5'-TCTGAGAAAGCCAGAGCTT-3'        | 5'-CAGAGATGGCAAATGACGA-3'       | #15       |
| <i>Plekhg5</i>  | 5'-AGATGCAGCTCTATCTGTGC-3'       | 5'-CCAAGTAGAACACGCGAAGC-3'      | #27       |

**Table S3.** Primer sequences for the quantification of rat gene expression using the LightCycler 480 SYBR Green Master

| Gene                   | Forward primer               | Reverse primer               |
|------------------------|------------------------------|------------------------------|
| <i>Gα<sub>12</sub></i> | 5'-CGGCAAGTCCACCTTCTCAAGC-3' | 5'-TGGTGTGCGGAACTCCAGCA-3'   |
| <i>β-MHC</i>           | 5'-GAGGGCGGACATTGCCGAGT-3'   | 5'-AAGGCTCAGGTCTCAGGGCTTC-3' |
| <i>ANP</i>             | 5'-CAGACCGATGAAGCGGGGGC-3'   | 5'-TCTTCGAGGCTCCGAGGGC-3'    |
| <i>GAPDH</i>           | 5'-GGGCTCTGCTCCTCCTGTT-3'    | 5'-CGTCCGATACGGCCAAATCCGT-3' |
| <i>ITGB3</i>           | 5'-GGGTACCAAGTTGGCCTCTC-3'   | 5'-GGTCACCTGGTGGTTAGTG-3'    |
| <i>CD44</i>            | 5'-CTGGGGACTACTTTGCCTCT-3'   | 5'-GGTGTGAAAGCCTCGCAGA-3'    |
